# Supplementary material for: Nerve pathology and neuropathic pain after whiplash injury: a systematic review and meta-analysis
Source: PubMed Central journal article supplement (PMC7612893; doi:10.1097/j.pain.0000000000002509), 2021-10-12
Supplement: EMS137227-supplement-Supplemental_tables.pdf [file EMS137227-supplement-Supplemental_tables.pdf]

**Supplemental Table S1. Example search strategies for all included search engines.**

**Pubmed**

|     |                                                                                                                                                                                                                                                                                                                                                                                                        |
|-----|--------------------------------------------------------------------------------------------------------------------------------------------------------------------------------------------------------------------------------------------------------------------------------------------------------------------------------------------------------------------------------------------------------|
| S1  | (MH "Whiplash") OR (MH "neck injuries)                                                                                                                                                                                                                                                                                                                                                                 |
| S2  | (MH Cohort studies) OR (MH Case-control studies) OR (MH observational study) OR (MH Cross-sectional studies)                                                                                                                                                                                                                                                                                           |
| S3  | S1 AND S2                                                                                                                                                                                                                                                                                                                                                                                              |
| S4  | (MH peripheral nervous system disease) OR (MH somatosensory disorder) OR (MH neuropathic pain) OR (MH nerve disorder)                                                                                                                                                                                                                                                                                  |
| S5  | (MH magnetic resonance imaging) OR (MH diffusion tensor imaging) OR (MH ultrasonography)                                                                                                                                                                                                                                                                                                               |
| S6  | ('painDETECT' OR 'Douleur Neuropathique en 4 question' OR 'DN4' OR 'S-LANSS' OR 'Neuropathic Pain Symptom Inventory' OR 'Neuropathic Pain Questionnaire' OR 'ID Pain' OR 'Neuropathic Pain Scale')                                                                                                                                                                                                     |
| S7  | (MH quantitative sensory testing) OR (neurological examination) OR (MH muscle strength) OR (MH electrodiagnosis) OR (MH neural conduction) OR ('dermatome OR 'myotome') OR (sympathetic reflexes) OR (small fibre neuropathy OR small fiber neuropathy OR small fibre sensory neuropathy OR small fiber sensory neuropathy OR small fibre pathology OR small fiber pathology) OR (intra-neural change) |
| S8  | (MH prevalence) OR (MH incidence) OR (MH epidemiology)                                                                                                                                                                                                                                                                                                                                                 |
| S9  | S3 AND S4                                                                                                                                                                                                                                                                                                                                                                                              |
| S10 | S3 and S5                                                                                                                                                                                                                                                                                                                                                                                              |
| S11 | S3 AND S6                                                                                                                                                                                                                                                                                                                                                                                              |
| S12 | S3 AND S7                                                                                                                                                                                                                                                                                                                                                                                              |
| S13 | S3 AND S4 AND S8                                                                                                                                                                                                                                                                                                                                                                                       |

**Embase and MEDLINE**

|   |                                                                                                                                                                                                                                                                                                                                                                                                                                                  |
|---|--------------------------------------------------------------------------------------------------------------------------------------------------------------------------------------------------------------------------------------------------------------------------------------------------------------------------------------------------------------------------------------------------------------------------------------------------|
| 1 | 'whiplash'/exp OR 'traffic accident'/exp OR 'whiplash associated disorder'/exp                                                                                                                                                                                                                                                                                                                                                                   |
| 2 | 'cohort study'/exp OR 'case control study'/exp OR 'observational study'/exp OR 'cross-sectional study'/exp                                                                                                                                                                                                                                                                                                                                       |
| 3 | 1 and 2                                                                                                                                                                                                                                                                                                                                                                                                                                          |
| 4 | 'peripheral nervous system disease' OR 'somatosensory disorder'/exp OR 'neuropathic pain'/exp OR 'nerve disorder' OR 'neuralgia'/exp OR 'peripheral nerve injury'/exp OR 'cervical plexus'/exp OR 'spinal nerve roots'/exp                                                                                                                                                                                                                       |
| 5 | 'neurological exam'/exp OR 'muscle strength'/exp OR 'electrodiagnosis'/exp OR 'neural conduction' OR 'dermatome' OR 'myotome' OR 'sympathetic reflex' OR 'small fibre neuropathy' OR 'small fiber neuropathy' OR 'small fibre sensory neuropathy' OR 'small fiber sensory neuropathy' OR 'small fibre pathology' OR 'small fiber pathology' OR 'intra neural change' OR 'quantitative sensory testing' OR 'muscle weakness' OR 'sensory testing' |
| 6 | 'douleur neuropathique 4 questions' OR 'leeds assessment of neuropathic symptoms and signs' OR 'paindetect' OR 'dn4' OR 'lanss' OR 's-lanss' OR 'neuropathic pain symptom inventory' OR 'neuropathic pain questionnaire' OR 'id pain' OR 'neuropathic pain scale'                                                                                                                                                                                |

|    |                                                                                              |
|----|----------------------------------------------------------------------------------------------|
| 7  | 'magnetic resonance imaging' /exp OR 'diffusion tensor imaging'/exp OR 'ultrasonography'/exp |
| 8  | 'prevalence'/exp OR 'incidence'/exp OR 'epidemiology'/exp                                    |
| 9  | 3 & 4                                                                                        |
| 10 | 3 & 5                                                                                        |
| 11 | 3 & 6                                                                                        |
| 12 | 3 & 7                                                                                        |
| 13 | 3, 4, & 8                                                                                    |

### **Cinahl (EBSCO)**

|     |                                                                                                                                                                                                                                                                                                                                                                            |
|-----|----------------------------------------------------------------------------------------------------------------------------------------------------------------------------------------------------------------------------------------------------------------------------------------------------------------------------------------------------------------------------|
| S1  | Whiplash OR Whiplash injuries OR whiplash disorders OR motor vehicle collision                                                                                                                                                                                                                                                                                             |
| S2  | MW cohort study OR case-control study OR observational study OR cross-sectional study                                                                                                                                                                                                                                                                                      |
| S3  | (MW cohort study OR case-control study OR observational study OR cross-sectional study) AND (S1 AND S2)                                                                                                                                                                                                                                                                    |
| S4  | Peripheral nervous system disease OR somatosensory disorder OR neuropathic pain OR nerve disorder OR neuralgia OR peripheral nerve injury OR cervical plexus OR spinal nerve roots                                                                                                                                                                                         |
| S5  | Neurological examination OR muscle strength OR electrodiagnosis OR neural conduction OR "dermatome" OR "myotome" OR "sympathetic reflexes" OR "small fibre neuropathy" OR "small fiber neuropathy" OR small fibre sensory neuropathy" OR "small fiber sensory neuropathy" OR "intra-neural change" OR "quantitative sensory testing" OR muscle weakness OR sensory testing |
| S6  | "Douleur Neuropathique 4 Questionnaire" OR "Leeds Assessment of Neuropathic Symptoms and Signs" OR "painDETECT" OR "DN4" OR "LANSS" OR S-LANSS" OR "Neuropathic Pain Symptom Inventory" OR "Neuropathic Pain Questionnaire" OR "ID Pain" OR "Neuropathic Pain Scale"                                                                                                       |
| S7  | Magnetic resonance imaging OR diffusion tensor imaging R ultrasonography                                                                                                                                                                                                                                                                                                   |
| S8  | Prevalence OR incidence OR epidemiology                                                                                                                                                                                                                                                                                                                                    |
| S9  | S3 AND S4                                                                                                                                                                                                                                                                                                                                                                  |
| S10 | S3 AND S5                                                                                                                                                                                                                                                                                                                                                                  |
| S11 | S3 AND S6                                                                                                                                                                                                                                                                                                                                                                  |
| S12 | S3 AND S7                                                                                                                                                                                                                                                                                                                                                                  |
| S13 | S3 AND S4 AND S8                                                                                                                                                                                                                                                                                                                                                           |

**Supplemental Table S2. Characteristics of included studies: design and population characteristics**

| Author & Date        | Study Design    | Study Participants        | Female participants       | Age of participants (years): mean (SD)                                    |
|----------------------|-----------------|---------------------------|---------------------------|---------------------------------------------------------------------------|
| Sterling (2009)      | Cross-sectional | WAD n=85                  | WAD n = 54                | WAD=36.27 (12.69)                                                         |
| Smith (2013)         | Cross-sectional | WAD n=90, controls n=30   | WAD n=58, controls n=21   | WAD recovered= 44.3 (10.4), Non-recovered=45.4 (9.7), controls=44.2 (9.7) |
| Karlsborg (1997)     | Cohort          | WAD n=34                  | WAD n=20                  | WAD=35.5                                                                  |
| Henrikson (2013)     | Cohort          | WAD n=20, controls n=10   | WAD n= 10                 | NA                                                                        |
| Chuang (2002)        | Cross-sectional | WAD n=85                  | NA                        | NA                                                                        |
| Smith (2014)         | Cohort          | WAD n=53, controls n=30   | WAD n=36, controls n=21   | WAD=44.7 (10.9), controls=44.2 (9.7)                                      |
| Sterling (2004)      | Cohort          | WAD n=80, controls n=20   | WAD n=56, controls n=11   | WAD=33.5 (14.7), controls= 39.5 (14.6)                                    |
| Serrano-Munoz (2019) | Cohort          | WAD n=20, controls n=15   | WAD n=16, controls n=9    | WAD No Pain (n=5)=40.8 (4.6), Pain (n=15)=39.7 (3.1), controls=40.5 (3.4) |
| Sterling (2010)      | Cohort          | WAD n=62, controls n=22   | WAD n= 36, controls n= 14 | WAD=36.1 (13.13), controls=40.1 (13.6)                                    |
| Bowles (2004)        | Cross-sectional | WAD n=25                  | WAD = 5                   | WAD = 37.5 (15.5)                                                         |
| Greening (2018)      | Cross-sectional | WAD n= 9, controls n = 13 | WAD n=6, controls n= 6    | WAD =46.8 (2.9), controls=38.9 (10.8)                                     |
| Hashish (2017)       | Cross-sectional | WAD n=903                 | WAD n=488                 | WAD=34.3 (18.04)                                                          |
| Chien (2009)         | Cross-sectional | WAD n=31, controls n=31   | WAD n=25, controls n=25   | WAD=35.3 (10.7), controls=31.4 (8.9)                                      |
| Chien (2008b)        | Cross-sectional | WAD n=52, controls n=31   | WAD n=32, controls n=25   | WAD=36.3 (13.1), controls=31.4 (8.9)                                      |
| Vaegter (2018)       | Cross-sectional | WAD n=108                 | WAD n=58                  | WAD=45.7 (11.6)                                                           |
| Greening (2005)      | Cross-sectional | WAD n=9, controls n=8     | WAD n=5, controls n=4     | WAD=37.2 (9.87), controls=40.8 (8.2)                                      |
| Pedler (2013)        | Cross-sectional | WAD n=64, controls n=24   | WAD n=35, controls n=14   | WAD=44.7 (12.6), controls=40.3 (13.4)                                     |
| Radanovf (1995)      | Cohort          | WAD n=117                 | WAD n=68                  | WAD =30.7 (9.6)                                                           |
| Alpar (2002)         | Cohort          | WAD n=38, controls n=30   | WAD n=28, controls n=18   | WAD=37.5, controls=34.2                                                   |
| Pettersson (1994)    | Cohort          | WAD n=39                  | WAD n=20                  | WAD=32 (range: 18-52)                                                     |
| Midha (1997)         | Cross-sectional | WAD n=16                  | NA                        | NA                                                                        |

|                     |                 |                                   |                                   |                                                       |
|---------------------|-----------------|-----------------------------------|-----------------------------------|-------------------------------------------------------|
| Miranda (2016)      | Cross-sectional | WAD n=20                          | NA                                | NA                                                    |
| Jonsson (1994)      | Cohort          | WAD n=24                          | WAD n=13                          | WAD=36.5 (9.6)                                        |
| Braddom (2009)      | Case-control    | WAD n=1,334                       | NA                                | WAD= 40                                               |
| Kaiser (2014)       | Cross-sectional | WAD n=12                          | NA                                | NA                                                    |
| Coert (1994)        | Cross-sectional | WAD n=157                         | NA                                | NA                                                    |
| Sterling (2006)     | Cohort          | WAD n=65                          | WAD n=56                          | WAD=36.27 (12.69)                                     |
| Sterling (2005)     | Cohort          | WAD n=76                          | WAD n=53                          | WAD=36.27 (12.69)                                     |
| Sturzenegger (1994) | Cohort          | WAD n=137                         | WAD n=81                          | WAD=30.8 (9.6)                                        |
| Goudman (2020)      | Case-control    | WAD n=21, controls n=18           | WAD n=10, controls n=11           | WAD=45.8 (40.41–51.08), controls=46.8 (27.73 - 51.21) |
| Sterner (2001)      | Cohort          | WAD n=43                          | WAD n=24                          | WAD=36.2 (23–62 )                                     |
| Radanov (1994)      | Cohort          | WAD n=117                         | WAD n=68                          | WAD=30.8 (9.6)                                        |
| Sterling (2002)     | Cohort          | WAD n=156, controls n=95          | WAD n=127, controls n=50          | WAD=37.43 (9.3), controls=38.95 (14.47)               |
| Bekelis (2014)      | Cohort          | WAD n=384,539                     | WAD n=164,292                     | WAD=40.45 (19.33)                                     |
| Lo (2007)           | Cohort          | WAD n=20                          | WAD n=10                          | WAD=42 (23–60)                                        |
| Sterling (2003)     | Cohort          | WAD n=76, controls n=20           | WAD n=54, controls n=12           | WAD=36.27 (12.69), controls=40.1 (13.6)               |
| Chien (2010)        | Cross-sectional | WAD n=50, controls n=31           | WAD n=39, controls n=25           | WAD=37.2 (10.4), controls=31.4 (8.9)                  |
| Farrell (2020)      | Cross-sectional | WAD n=24, controls n=24           | WAD n=16                          | WAD=49 (15 IQR), controls=50 (17 IQR)                 |
| Squires (1996)      | Cohort          | WAD n=37                          | NA                                | WAD symptomatic=40.7, WAD asymptomatic=30.7           |
| Chuang (1998)       | Cross-sectional | WAD n=14                          | WAD n=6                           | WAD=38.26 (14.85)                                     |
| Sturzenegger (1995) | Cohort          | WAD n=117                         | WAD n=73                          | WAD=30.8 (9.5)                                        |
| Saadat (2011)       | Cross-sectional | WAD n=78                          | NA                                | NA                                                    |
| Moog (2002)         | Case-control    | WAD n=43, controls n=43           | WAD n=28, controls n=28           | WAD=37 (12-66), controls=NA                           |
| Sterling (2006)     | Cohort          | WAD n=76                          | WAD n=53                          | WAD=33.5 (14.7)                                       |
| Wallin (2012)       | Cohort          | WAD n=28, WAD n=17, controls n=18 | WAD n=28, WAD n=16, controls n=17 | WAD=40.1 (7.1)                                        |
| Raak (2006)         | Cohort          | WAD n=17, controls n=18           | WAD n=16, controls n=17           | WAD=50.8 (11.3), controls=44.8 (10.2)                 |
| Mailis (1995)       | Cohort          | WAD n=32                          | WAD n=23                          | WAD=27.5 (23-55)                                      |
| Kaiser (2012)       | Cross-sectional | WAD n=75                          | WAD n=10                          | NA                                                    |

|                  |                 |                         |                         |                                      |
|------------------|-----------------|-------------------------|-------------------------|--------------------------------------|
| Chien (2008a)    | Cross-sectional | WAD n=50, controls n=31 | WAD n=39, controls n=25 | WAD=37.2 (10.4), controls=31.4 (8.9) |
| Maimaris (1988)  | Cohort          | WAD n=102               | WAD n=58                | WAD=37 (17-72)                       |
| Ovadia (2002)    | Cohort          | WAD n=866               | WAD n=439               | WAD=38 (26-50)                       |
| Steinberg (2005) | Cohort          | WAD n=330               | WAD n=193               | WAD=19 (18)                          |
| Terzis (2009)    | Cross-sectional | WAD n=25                | NA                      | NA                                   |
| Scott (2005)     | Case-control    | WAD n=29 controls n=20  | WAD n=17 controls n=12  | WAD=41.6 (10), controls=31.25 (10)   |

**Supplemental Table S3. Quality Assessment using the Newcastle-Ottawa Scales**

| Author                 | Year | Selection | Comparability | Outcome | Total score |
|------------------------|------|-----------|---------------|---------|-------------|
| <b>Cross-sectional</b> |      | ( /5)     | ( /2)         | ( /3)   | ( /10)      |
| Sterling et al.        | 2009 | 4         | 0             | 3       | 7           |
| Smith et al.           | 2013 | 4         | 2             | 2       | 8           |
| Chuang et al.          | 2002 | 3         | 1             | 3       | 7           |
| Bowles et al.          | 2004 | 2         | 0             | 3       | 5           |
| Greening et al.        | 2018 | 4         | 2             | 3       | 9           |
| Hashish et al.         | 2017 | 2         | 0             | 2       | 4           |
| Chien A et al.         | 2009 | 4         | 1             | 2       | 7           |
| Chien et al.           | 2008 | 4         | 1             | 2       | 7           |
| Vaegter et al.         | 2018 | 5         | 0             | 2       | 7           |
| Greening et al.        | 2005 | 4         | 1             | 3       | 8           |
| Pedler et al.          | 2013 | 5         | 1             | 2       | 8           |
| Midha                  | 1997 | 3         | 0             | 2       | 5           |
| Miranda et al.         | 2016 | 3         | 0             | 0       | 3           |
| Kaiser et al.          | 2014 | 3         | 0             | 3       | 6           |
| Coert et al.           | 1994 | 3         | 0             | 2       | 5           |
| Chien et al.           | 2010 | 4         | 1             | 2       | 7           |
| Farrell et al.         | 2020 | 5         | 2             | 3       | 10          |
| Chuang et al.          | 1998 | 2         | 0             | 2       | 4           |
| Saadat et al.          | 2011 | 2         | 1             | 2       | 5           |
| Kaiser et al.          | 2012 | 3         | 0             | 3       | 6           |
| Chien et al.           | 2008 | 4         | 1             | 3       | 8           |
| Terziset al.           | 2009 | 3         | 0             | 0       | 3           |
| <b>Cohort</b>          |      | ( /4)     | ( /2)         | ( /3)   | ( /9)       |
| Karlsborg et al.       | 1997 | 2         | 0             | 3       | 5           |
| Henrikson et al.       | 2013 | 0         | 1             | 3       | 4           |
| Jull et al.            | 2014 | 3         | 2             | 3       | 8           |
| Sterling et al.        | 2004 | 4         | 1             | 3       | 8           |
| Serrano-Munoz          | 2019 | 3         | 1             | 2       | 6           |
| Sterling               | 2010 | 3         | 1             | 3       | 7           |
| Radanov et al.         | 1995 | 2         | 1             | 2       | 5           |
| Alpar et al.           | 2002 | 2         | 0             | 3       | 5           |
| Pettersson et al.      | 1994 | 2         | 0             | 3       | 5           |
| Jonsson et al.         | 1994 | 2         | 0             | 3       | 5           |
| Sterling et al.        | 2006 | 2         | 1             | 3       | 6           |
| Sterling et al.        | 2005 | 2         | 1             | 3       | 6           |
| Sturzenegger et al.    | 1994 | 3         | 1             | 1       | 5           |
| Sterner et al.         | 2001 | 2         | 0             | 1       | 3           |
| Radanov et al.         | 1994 | 3         | 1             | 2       | 6           |
| Sterling et al.        | 2002 | 4         | 0             | 2       | 6           |
| Bekelis et al.         | 2014 | 3         | 0             | 1       | 4           |
| Lo et al.              | 2007 | 3         | 1             | 3       | 7           |
| Sterling et al.        | 2003 | 2         | 1             | 3       | 6           |

|                     |      |       |       |       |       |
|---------------------|------|-------|-------|-------|-------|
| Squires et al.      | 1996 | 1     | 0     | 2     | 3     |
| Sturzenegger et al. | 1995 | 3     | 1     | 2     | 6     |
| Sterling et al.     | 2006 | 2     | 1     | 2     | 5     |
| Wallin et al.       | 2012 | 1     | 1     | 2     | 4     |
| Raak et al.         | 2006 | 1     | 0     | 2     | 3     |
| Mailis et al.       | 1995 | 2     | 1     | 2     | 5     |
| Maimaris et al.     | 1988 | 2     | 0     | 2     | 4     |
| Ovadia et al.       | 2002 | 2     | 0     | 3     | 5     |
| Steinberg et al.    | 2005 | 2     | 0     | 3     | 5     |
| Case-control        |      | ( /4) | ( /2) | ( /3) | ( /9) |
| Braddom et al.      | 2009 | 3     | 1     | 2     | 6     |
| Goudman et al.      | 2020 | 3     | 1     | 1     | 5     |
| Moog et al.         | 2002 | 4     | 1     | 1     | 6     |
| Scott et al.        | 2005 | 3     | 1     | 1     | 5     |

**Supplemental Table S4. Synthesis of results by type of outcome measure.**  
Please note this does not include the sensory testing studies which are reported in Figure 2.

| Measure                                                                              | Number of studies | Number of participants | WAD grade | Outcome                                                                                                                                                                                                                                  | Interpretation                                                                                                                            |
|--------------------------------------------------------------------------------------|-------------------|------------------------|-----------|------------------------------------------------------------------------------------------------------------------------------------------------------------------------------------------------------------------------------------------|-------------------------------------------------------------------------------------------------------------------------------------------|
| S-LANSS <sup>32,44,89,90,106</sup>                                                   | 4                 | 208                    | I-III     | A combined total n=71 WAD participants had positive scores $\geq 12$ . When subdivided by WAD II, 42 of 123 participants had scores $\geq 12$ .                                                                                          | 34% of both the total WAD population as well as patients with WAD II had scores suggestive of neuropathic pain ( $\geq 12$ )              |
| DN4 <sup>89</sup>                                                                    | 1                 | 20                     | I-III     | No Pain (n=5): median 3 (IQR 1.5), Pain (n=15): median 4 (IQR 3) out of 10.                                                                                                                                                              | 75% (of 20 participants) had scores suggestive of neuropathic pain ( $\geq 4$ ).                                                          |
| NPSI <sup>32,89</sup>                                                                | 2                 | 44                     | I-III     | WAD I-III: No Pain (n=5): median 0 (IQR 2), Pain (n=15): median 3 (IQR 6) out of 10.<br><br>WAD II: Mean (SD) score: 26.1 (18.3) out of 100.                                                                                             | Overall, participants had low severity (3/10 and 26.1/100) of neuropathic pain symptoms.                                                  |
| Neurological examination <sup>2,32,44,55,58,62,66,73,76,79,80,92,107-110</sup>       | 16                | 1,885                  | I-IV      | n=241 pooled patients had positive findings                                                                                                                                                                                              | 13% of pooled WAD patients had positive findings                                                                                          |
| Electrodiagnostic testing <sup>2,11,12,19,20,22,50,56,57,62,67,68,73,83,94,115</sup> | 16                | 3,921                  | I-III     | n=1,249 pooled participants had positive findings of peripheral nerve pathology                                                                                                                                                          | 32% of pooled WAD participants had positive findings                                                                                      |
| Magnetic resonance imaging <sup>44</sup>                                             | 1                 | 9                      | II        | Greater T2 signal intensity (brachial plexus, median nerve - wrist): WAD mean= $0.52 \pm 0.13$ and $2.09 \pm 0.33$ , respectively) compared to the control group (mean= $0.45 \pm 0.07$ and $1.38 \pm 0.31$ , respectively; $P < .05$ ). | These findings suggest that patients with chronic whiplash may have peripheral nerve pathology measured at the wrist and brachial plexus. |
| Ultrasound <sup>45</sup>                                                             | 1                 | 9                      | II        | WAD participants had significantly reduced longitudinal [mean=0.38 (0.08) mm, (95% CI=0.20–0.56 mm)] and transverse nerve movement [2.57 (0.80) mm, (95% CI=0.61–4.54 mm)] on the symptomatic side compared to the control group.        | The results suggest nerve sliding impairments at both the forearm and the wrist compared to healthy controls.                             |



|                                                               |   |         |        |                                                                                                                                                                                                                                      |                                                                                                                                                                         |
|---------------------------------------------------------------|---|---------|--------|--------------------------------------------------------------------------------------------------------------------------------------------------------------------------------------------------------------------------------------|-------------------------------------------------------------------------------------------------------------------------------------------------------------------------|
| Sympathetic vasoconstrictor reflex <sup>101,102,104,105</sup> | 4 | 293     | II-III | SVR results: Quotient of Integrals (QI) mean 59.42 (7.13). Sympathetic Reflex (SFR)= 0.72 (.70)                                                                                                                                      | These findings may suggest sympathetic nerve dysfunction.                                                                                                               |
| Laser evoked potentials <sup>43</sup>                         | 1 | 21      | I-III  | No between-group differences (WAD and controls) for stimulus intensity (A-delta fibers), amplitudes and latencies of laser evoked potential wave components.                                                                         | This study did not find a functional deficit in sensory afferent a-delta nerve fibers.                                                                                  |
| ICD-9 codes (nerve injury) <sup>7,83</sup>                    | 2 | 384,617 | NA     | n=3,164 participants with ICD-9 codes for peripheral nerve injury                                                                                                                                                                    | 1% of pooled WAD data showed signs of nerve injury or neuropathic pain identified through ICD-9 codes.                                                                  |
| Cutaneous silent periods <sup>62</sup>                        | 1 | 20      | I-III  | 18 of 20 participants demonstrated abnormal findings of at least one CSP recording (measured at hand and foot).                                                                                                                      | These findings may indicate peripheral nerve dysfunction, but larger studies are needed.                                                                                |
| Intraepidermal nerve fiber density <sup>32</sup>              | 1 | 24      | II     | Index finger: WAD median (IQR) IENFD 4.5 (4.9) fibres/mm compared with 7.3 (3.9) fibres/mm for the control group (p = .010, r = .37.) Ankle: WAD mean [SD]: IENFD 7.3 [3.7] fibres/mm; control group: 9.3 [3.8] fibres/mm (p = .09). | IENFD demonstrated structural peripheral nerve pathology at the index finger of participants with WAD II.                                                               |
| Nerve palpation <sup>2,44,45,65</sup>                         | 4 | 88      | I-III  | An average of 91% (range 67-100%, n=56 total patients) and 94% (range 78-100%, n=50 total patients) had symptom reproduction with palpation of the median nerve and brachial plexus respectively.                                    | Median nerve and brachial plexus palpation reproduced pain and symptoms suggestive of neural mechanosensitivity in a majority of patients in the included four studies. |

**Abbreviations:** CSP: Cutaneous silent period; DN4: Douleur Neuropathique 4; ICD: International Classification of Diseases; IENFD: intraepidermal nerve fibre density; IQR: interquartile range; NPSI: Neuropathic Pain Symptom Inventory; NA: not available; SD: standard deviation; S-LANSS: Self-complete Leeds Assessment of Neuropathic Symptoms and Signs; WAD: whiplash associated disorders.
